# Supplementary material
Source: Springer Nature journal article supplement (https://www.springermedizin.de/resource/supplementary/13054_2011_9557_MOESM1_ESM.pdf/9706464)
Supplement: MOESM1 [file 9706464]

consecutively admitted patients  
N= 986

excluded: patients without  
antibiotic therapy  
N= 277

patients included for analysis  
N= 709

Female patients  
N= 309

Male patients  
N= 400

with sepsis  
N= 130

with sepsis  
N= 197
